# Supplementary material
Source: Royal Society of Chemistry journal article supplement (doi:10.1039/d6sm00167j)
Supplement: d6sm00167j1.pdf [file d6sm00167j1.pdf]

# Supplementary Information:

## Effects of Surface Roughness on Droplet Impact Dynamics

Joe Ghossein<sup>1,\*</sup>, Chinmay Kendurkar<sup>1</sup>, Jonathan B. Boreyko<sup>2</sup>, and Olivier Coutier-Delgosha<sup>1,3,†</sup>

<sup>1</sup>Kevin T. Crofton Department of Aerospace and Ocean Engineering, Virginia Tech, Blacksburg, VA

<sup>2</sup>Department of Mechanical Engineering, Virginia Tech, Blacksburg, VA, USA

<sup>3</sup>CNRS, ONERA, Arts et Métiers ParisTech, Centrale Lille, FRE 2017 – LMFL, Laboratoire de Mécanique des Fluides de Lille, F-59000 Lille, France

June 16, 2026

### Contents

|                                                                         |          |
|-------------------------------------------------------------------------|----------|
| <b>S1 Statistical Robustness and Adjusted <math>R^2</math> Analysis</b> | <b>2</b> |
| S1.1 Elastic Regime ( $We < 30$ ) . . . . .                             | 2        |
| S1.2 Inelastic Regime ( $We \geq 30$ ) . . . . .                        | 2        |
| <b>S2 Comparison with the Empirical Model of Singh et al.</b>           | <b>3</b> |
| <b>S3 Experimental Matrix</b>                                           | <b>4</b> |
| <b>S4 Impact Results</b>                                                | <b>5</b> |

---

\* e-mail: joe20ghossein@vt.edu

† e-mail: ocoutier@vt.edu

## S1 Statistical Robustness and Adjusted $R^2$ Analysis

To verify that the high predictive accuracy of our bimodal framework is not a result of overfitting, we performed an adjusted coefficient of determination ( $R_{adj}^2$ ) analysis. This metric penalizes the model for the number of free parameters ( $k$ ) relative to the number of data points ( $n$ ), ensuring the scaling laws remain statistically robust and are not overly sensitized to the number of variables. The adjusted  $R^2$  is calculated as:

$$R_{adj}^2 = 1 - \left[ \frac{(1 - R^2)(n - 1)}{n - k - 1} \right] \quad (1)$$

### S1.1 Elastic Regime ( $We < 30$ )

In the elastic regime, the model utilizes two independent fitting parameters: the prefactor  $\kappa$  and the geometric constant  $B_0$  ( $k = 2$ ). The data set for this regime consists of 10 experimental points from the current study and 60 data points from Singh et al.[2021](#) (total  $n = 70$ ).

- $n = 70$
- $k = 2$
- $R^2 = 0.91$
- $R_{adj}^2 = 0.907 \approx 0.91$

### S1.2 Inelastic Regime ( $We \geq 30$ )

In the inelastic regime, where inertial and viscous effects dominate, the geometric constant  $B_0$  is negligible, and the model relies on a single fitting parameter: the prefactor  $\alpha$  ( $k = 1$ ). This regime comprises 25 valid experimental data points (excluding shattering and splashing).

- $n = 25$
- $k = 1$
- $R^2 = 0.98$
- $R_{adj}^2 = 0.978 \approx 0.98$

The negligible difference between  $R^2$  and  $R_{adj}^2$  in both regimes confirms that the model is mathematically lean and the observed trends are driven by the underlying physical scaling rather than parameterization.

## S2 Comparison with the Empirical Model of Singh et al.

To further show the robustness of our presented mode, we compare our experimental data for maximum spreading ratio ( $\beta_{\max}$ ) against the empirical model proposed by Singh et al. 2021. The Singh model utilizes a power-law relationship incorporating the 1D roughness amplitude ( $R_a$ ) and the Weber number:

$$\beta_{\max} = 0.39 \left( \frac{We}{Oh} \right)^{0.1} \left( \frac{R_a}{D_0} \right)^{-0.065} \quad (2)$$

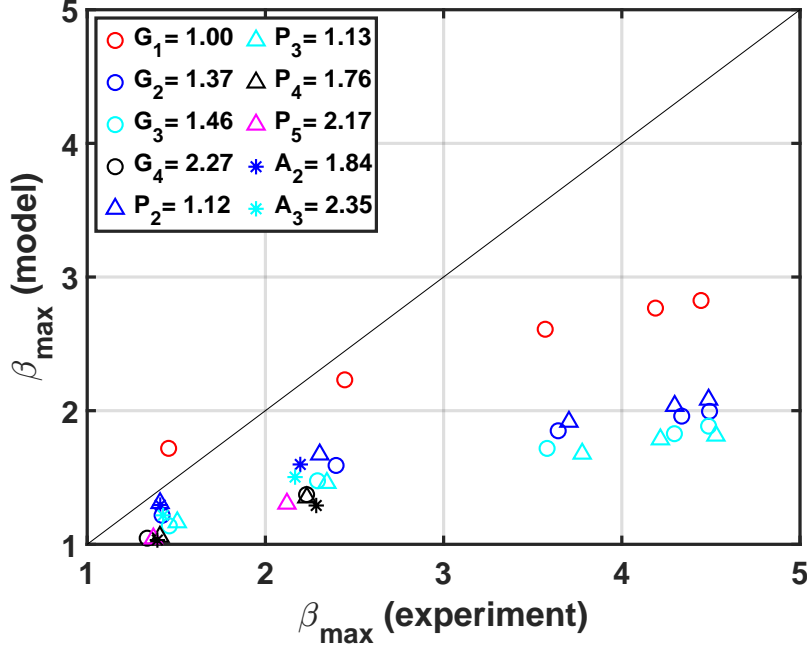

Figure S1: Comparison between experimental results and the empirical model proposed by Singh et al. The model exhibits a significant systematic under-prediction for spreading ratios  $\beta_{\max} > 2$ , failing to capture the inertial dynamics of high-velocity impacts. This deviation highlights the limited range of validity of empirical power-law fits compared to the physically grounded energy-balance framework proposed in this study.

As shown in Figure S1 the Singh model exhibits a significant systematic under-prediction of the experimental data, particularly for impacts where  $\beta_{\max} > 2.5$ . We attribute this discrepancy to three primary factors:

1. **Restricted Spreading Regime:** The Singh model was calibrated using a data set where the spreading ratio remained relatively low ( $1 < \beta_{\max} < 2$ ). As evidenced by our data, the power-law scaling fails to capture the inertial dynamics of larger, 'pancake-like' impacts typical of higher Weber numbers ( $We > 100$ ).
2. **Roughness Descriptor:** The model relies on the average roughness amplitude ( $R_a$ ). As discussed in Section 2 of the main text,  $R_a$  is an amplitude-based metric that does not uniquely define the interfacial area ratio ( $r$ ). Consequently, it cannot fully account for the Wenzel-state surface energy changes that govern spreading on complex topographies.
3. **Absence of Energy Balance:** Unlike the energy-based framework proposed in this study, the Singh model does not explicitly account for the partition of energy between surface creation and viscous dissipation. This leads to a 'plateau' effect in the model's predictions (Figure S1) that does not reflect the physical reality of continuous inertial spreading.

These results reinforce the necessity of a bimodal, energy-based framework to maintain predictive accuracy across diverse surface topographies and impact velocities.

### S3 Experimental Matrix

Table S1: Laser printer settings used for glass surfaces

| Glass                       |      |          |       |               |
|-----------------------------|------|----------|-------|---------------|
| Roughness ( $\mu\text{m}$ ) | DPI  | Power(%) | Speed | No. of Passes |
| 0.012                       | 0    | 0        | 0     | 0             |
| 2.37                        | 1000 | 25       | 80    | 1             |
| 6.5                         | 1000 | 50       | 80    | 1             |
| 22.49                       | 1000 | 20       | 50    | 7             |

Table S2: Laser printer settings used for PETG surfaces

| PETG                        |      |          |       |               |
|-----------------------------|------|----------|-------|---------------|
| Roughness ( $\mu\text{m}$ ) | DPI  | Power(%) | Speed | No. of Passes |
| 1.18                        | 1000 | 8        | 100   | 1             |
| 9.61                        | 1000 | 10       | 100   | 2             |
| 31.33                       | 400  | 25       | 80    | 4             |
| 55.04                       | 100  | 40       | 60    | 7             |

Table S3: Laser printer settings used for aluminum surfaces

| Aluminum                    |                |          |       |               |
|-----------------------------|----------------|----------|-------|---------------|
| Roughness ( $\mu\text{m}$ ) | Frequency (Hz) | Power(%) | Speed | No. of Passes |
| 2.21                        | 20             | 50       | 90    | 1             |
| 5.71                        | 20             | 90       | 90    | 1             |
| 58.31                       | 20             | 100      | 20    | 6             |

## S4 Impact Results

Table S4: Impact results for glass. Reported values for each data point correspond to mean values of three runs.

| Glass  |            |             |        |                |                                |                  |
|--------|------------|-------------|--------|----------------|--------------------------------|------------------|
| Sample | $D_0$ (mm) | $V_0$ (m/s) | We     | $\beta_{\max}$ | Impact behavior                | Droplet Ejection |
| 1      | 2.10       | 0.31        | 2.75   | 1.46           | Staircase                      | No               |
|        | 2.09       | 1.14        | 37.60  | 2.45           | Deposition & Worthington Jet   | No               |
|        | 2.17       | 2.41        | 173.06 | 3.57           | Deposition                     | No               |
|        | 2.13       | 3.32        | 319.96 | 4.19           | Deposition                     | No               |
|        | 2.10       | 3.71        | 396.94 | 4.44           | Deposition                     | No               |
| 2      | 2.09       | 0.31        | 2.74   | 1.42           | Staircase                      | No               |
|        | 2.09       | 1.18        | 39.61  | 2.39           | Deposition & Worthington Jet   | No               |
|        | 2.17       | 2.41        | 172.64 | 3.64           | Deposition & Receding Breakup  | No               |
|        | 2.11       | 3.32        | 317.32 | 4.34           | Receding Breakup               | No               |
|        | 2.09       | 3.71        | 393.65 | 4.49           | Receding Breakup               | No               |
| 3      | 2.15       | 0.30        | 2.62   | 1.46           | Staircase                      | No               |
|        | 2.12       | 1.11        | 35.71  | 2.29           | Deposition & Worthington Jet   | No               |
|        | 2.14       | 2.35        | 161.32 | 3.58           | Deposition                     | No               |
|        | 2.11       | 3.26        | 305.63 | 4.30           | Deposition & Negligible Splash | No               |
|        | 2.12       | 3.76        | 410.42 | 4.49           | Deposition & Negligible Splash | No               |
| 4      | 2.04       | 0.31        | 2.67   | 1.34           | Staircase                      | No               |
|        | 2.09       | 1.17        | 39.41  | 2.23           | Deposition                     | No               |
|        | 2.13       | 2.38        | 164.91 | –              | Shattering                     | No               |
|        | 2.17       | 3.28        | 318.83 | –              | Shattering                     | No               |
|        | 2.17       | 3.76        | 418.84 | –              | Shattering                     | No               |

Table S5: Impact results for PETG. Reported values for each data point correspond to mean values of three runs.

| PETG   |            |             |        |                |                                      |                  |
|--------|------------|-------------|--------|----------------|--------------------------------------|------------------|
| Sample | $D_0$ (mm) | $V_0$ (m/s) | We     | $\beta_{\max}$ | Impact behavior                      | Droplet Ejection |
| 2      | 2.06       | 0.36        | 3.66   | 1.41           | Staircase & Worthington Jet          | Yes              |
|        | 2.09       | 1.21        | 41.66  | 2.31           | Staircase & Worthington jet          | Yes              |
|        | 2.10       | 2.38        | 162.91 | 3.70           | Deposition                           | No               |
|        | 2.06       | 3.28        | 303.19 | 4.29           | Deposition & Negligible Splash       | No               |
|        | 2.06       | 3.67        | 380.09 | 4.49           | Deposition & Negligible Splash       | No               |
| 3      | 1.99       | 0.41        | 4.64   | 1.51           | Staircase & Worthington Jet          | Yes              |
|        | 2.09       | 1.21        | 41.73  | 2.35           | Deposition & Worthington Jet         | Yes              |
|        | 2.11       | 2.41        | 167.79 | 3.78           | Deposition & Receding Breakup        | No               |
|        | 2.09       | 3.32        | 314.34 | 4.22           | Deposition & Receding Breakup        | No               |
|        | 2.05       | 3.67        | 376.65 | 4.53           | Negligible Splash & Receding Breakup | No               |
| 4      | 2.05       | 0.36        | 3.65   | 1.41           | Staircase & Worthington Jet          | No               |
|        | 2.09       | 1.21        | 41.62  | 2.23           | Deposition & Worthington Jet         | No               |
|        | 2.09       | 2.41        | 167.11 | -              | Splashing                            | No               |
|        | 2.09       | 3.32        | 315.82 | -              | Splashing                            | No               |
|        | 2.11       | 3.76        | 407.28 | -              | Splashing                            | No               |
| 5      | 2.03       | 0.41        | 4.2    | 1.37           | Staircase & Worthington Jet          | No               |
|        | 2.11       | 1.21        | 41.93  | 2.12           | Deposition                           | No               |
|        | 2.09       | 2.41        | 166.97 | -              | Splashing                            | No               |
|        | 2.09       | 3.32        | 315.99 | -              | Shattering                           | No               |
|        | 2.13       | 3.80        | 421.20 | -              | Shattering                           | No               |

Table S6: Test matrix results for aluminum. Reported values for each data point correspond to mean values of three runs.

| Aluminum |            |             |        |                |                 |                  |
|----------|------------|-------------|--------|----------------|-----------------|------------------|
| Sample   | $D_0$ (mm) | $V_0$ (m/s) | We     | $\beta_{\max}$ | Impact behavior | Droplet Ejection |
| 2        | 2.08       | 0.41        | 4.85   | 1.41           | Full Rebound    | No               |
|          | 2.09       | 1.18        | 39.65  | 2.19           | Full Rebound    | Yes              |
|          | 2.07       | 2.41        | 165.13 | -              | Shattering      | No               |
|          | 2.09       | 3.32        | 314.01 | -              | Shattering      | No               |
|          | 2.10       | 3.76        | 406.09 | -              | Shattering      | No               |
| 3        | 2.09       | 0.41        | 4.85   | 1.43           | Full Rebound    | No               |
|          | 2.11       | 1.18        | 39.78  | 2.17           | Full Rebound    | Yes              |
|          | 2.09       | 2.35        | 158.46 | -              | Shattering      | No               |
|          | 2.12       | 3.32        | 318.64 | -              | Shattering      | No               |
|          | 2.01       | 3.76        | 388.48 | -              | Shattering      | No               |
| 4        | 2.08       | 0.39        | 4.25   | 1.39           | Full Rebound    | No               |
|          | 2.09       | 1.18        | 39.50  | 2.29           | Full Rebound    | Yes              |
|          | 2.08       | 2.38        | 161.32 | -              | Shattering      | Yes              |
|          | 2.09       | 3.32        | 314.18 | -              | Shattering      | No               |
|          | 2.14       | 3.76        | 412.82 | -              | Shattering      | No               |

## References

R. K. Singh, P. D. Hodgson, N. Sen and S. Das, *Langmuir*, 2021, **37**, 3038–3048.
